# Supplementary material
Source: Springer Nature journal article supplement (https://www.springermedizin.de/resource/supplementary/13023_2011_323_MOESM2_ESM.pdf/9642108)

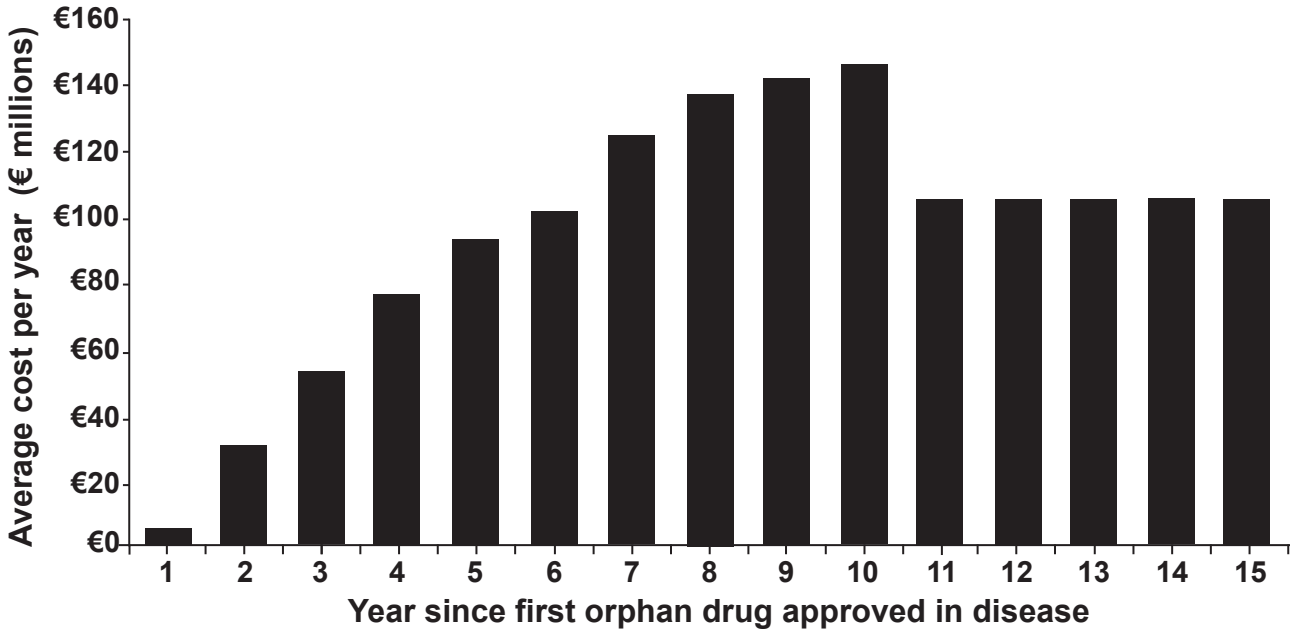

Supplement: MOESM2 [file 9642108]
